# Supplementary material
Source: publisher figshare collection journal article supplement (https://acs.figshare.com/ndownloader/files/4212151)
Supplement: Supplementary file 1 [file 4212151]

# Peripheral and Structural Effects on the Band Gap of Acceptor-Donor Type Conducting Polymers Containing Pendant Bisfulleroid Groups

Alimet Sema Özen\*

Faculty of Science and Letters, Piri Reis University, 34940, Tuzla, İstanbul, Turkey,

Faculty of Engineering and Natural Sciences, Sabanci University, 34956, Tuzla, Istanbul

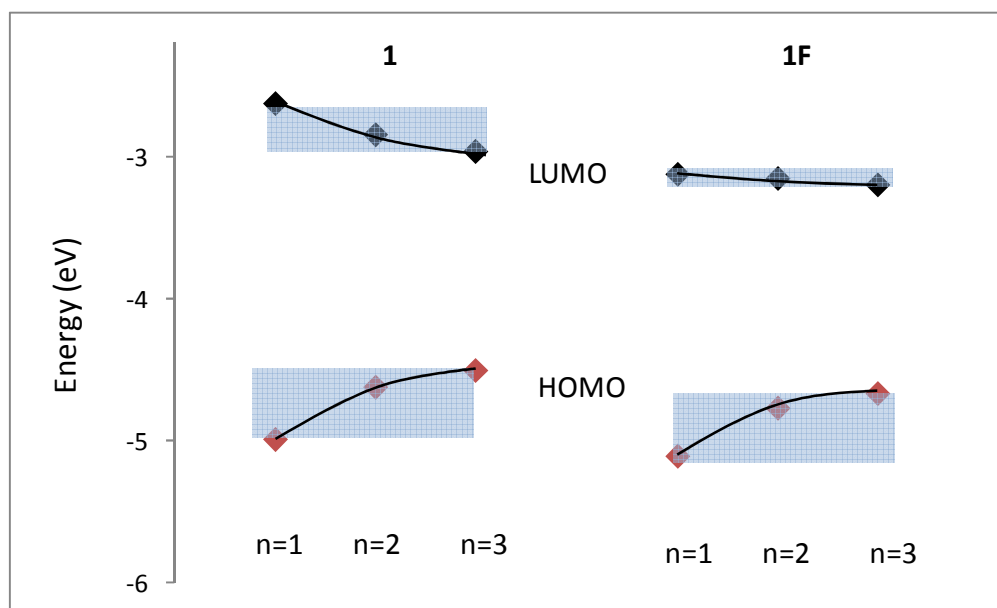

**Figure 1S** Change in the HOMO and LUMO levels by the extension of the conjugation in the derivatives of **1** and **1F**.

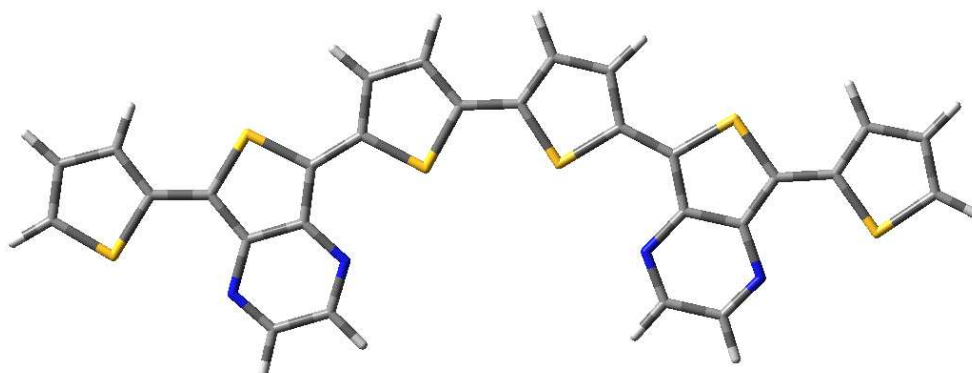

**Figure 2S.** MPW1B95/6-31G\* optimized structure for the dimer of thiophene-thienopyrazine-thiophene where dihedral angle is 0°.

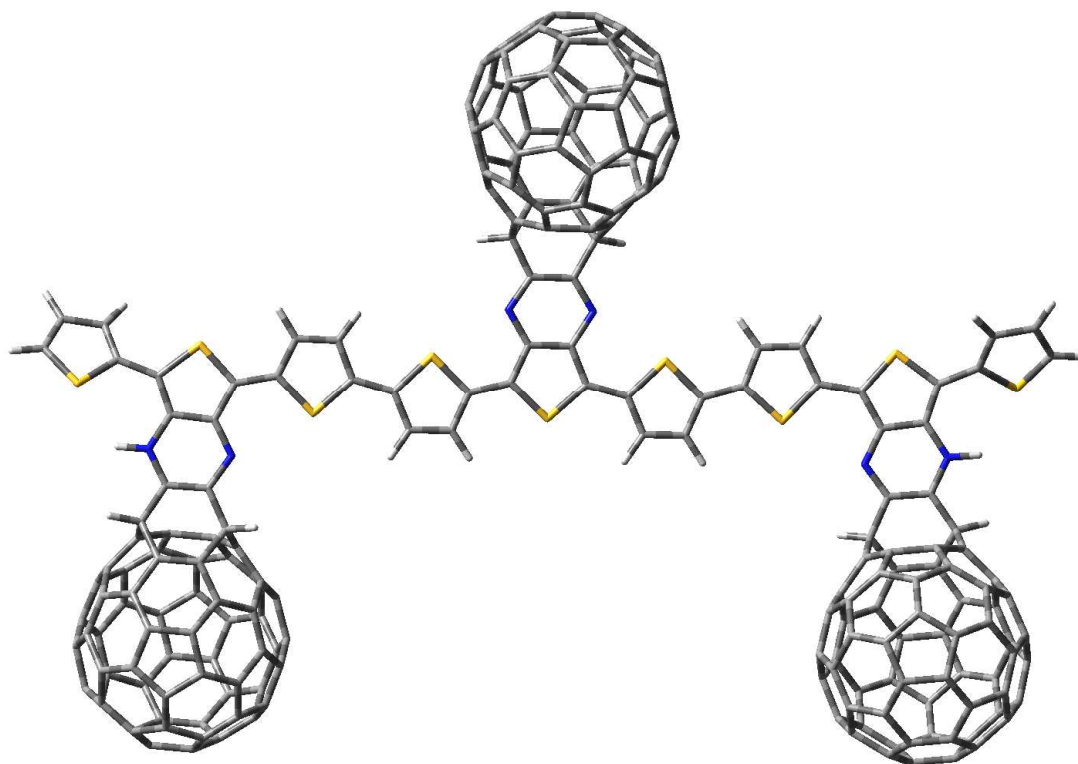

**Figure 3S** MPW1B95/6-31G\* optimized structure of the protonated trimer of **1F**

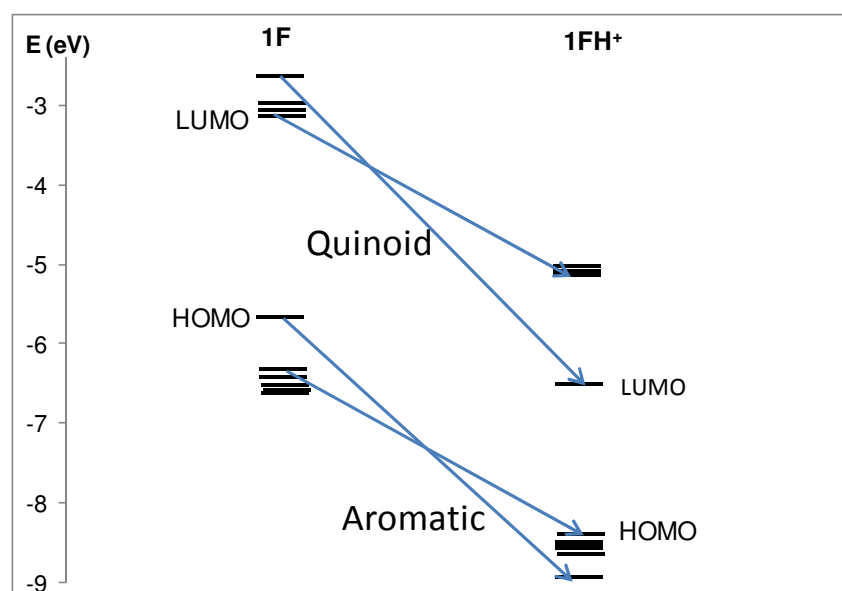

**Figure 4S.** Change in the orbital energy levels by protonation (MPW1B95/6-31G\*)
